# Supplementary material for: Synthesis of SiO2@MnCo2O4 core–shell nanorattles using layered double hydroxide precursors and studies on their peroxidase-like activity
Source: Royal Society of Chemistry journal article supplement (doi:10.1039/d2nj04901e), 2023-01-01
Supplement: d2nj04901e1.pdf [file d2nj04901e1.pdf]

## Supporting Information

# Synthesis of SiO<sub>2</sub>@MnCo<sub>2</sub>O<sub>4</sub> core-shell nanorattles using layered double hydroxide precursors and studies on their peroxidase-like activity

Pankaj Rana and Pethaiyan Jeevanandam\*

Department of Chemistry, Indian Institute of Technology Roorkee, Roorkee-247667, India

E-mail: jeevafcy@iitr.ac.in; Fax: +91-1332-273560; Tel: +91-1332-285444

### Characterization of SiO<sub>2</sub>@MnCo-LDH precursors

#### Phase analysis

The XRD patterns of SiO<sub>2</sub> and SiO<sub>2</sub>@MnCo-LDH precursors are displayed in Figure S1. The XRD pattern of SiO<sub>2</sub> displays broad humps indicating its amorphous nature. The XRD pattern of MnCo-LDH displays (00*l*) basal reflections in the low 2θ region characteristic of layered double hydroxides.<sup>1</sup> The XRD peaks around 2θ = 11.6°, 23.7°, 33.2°, and 58.3° are assigned to (003), (006), (101), and (110) planes of MnCo-LDH. The XRD patterns of SiO<sub>2</sub>@MnCo-LDH samples (SiO<sub>2</sub>@MnCo-LDH-0.25, SiO<sub>2</sub>@MnCo-LDH-0.5, and SiO<sub>2</sub>@MnCo-LDH-1) show peaks around 2θ = 11.6°, 23.9°, 33.3°, and 58.2° attributed to the different crystal planes of MnCo-LDH. The interlayer spacing, estimated using (003) reflections of MnCo-LDH and SiO<sub>2</sub>@MnCo-LDH samples, is about 7.6 Å.

#### FT-IR analysis

Figure S2 shows the FT-IR spectra of SiO<sub>2</sub>, MnCo-LDH, and SiO<sub>2</sub>@MnCo-LDH samples (SiO<sub>2</sub>@MnCo-LDH-0.25, SiO<sub>2</sub>@MnCo-LDH-0.5, and SiO<sub>2</sub>@MnCo-LDH-1). Table S1 gives the summary of IR bands and assignment for MnCo-LDH and SiO<sub>2</sub>@MnCo-LDH samples. The IR spectrum of SiO<sub>2</sub> shows characteristic peaks at about 1100 cm<sup>-1</sup> and 795 cm<sup>-1</sup> due to asymmetric and symmetric stretching vibrations of Si-O-Si, respectively. The IR bands observed at about 958 cm<sup>-1</sup> and 469 cm<sup>-1</sup> are assigned to stretching vibration of Si-OH and bending vibration of Si-O-Si, respectively.<sup>2</sup> The IR spectrum of MnCo-LDH shows bands around 2217 cm<sup>-1</sup> and 1382 cm<sup>-1</sup> due to OCN<sup>-</sup> and NO<sub>3</sub><sup>-</sup>, respectively. The band observed at about 639 cm<sup>-1</sup> is ascribed to the stretching vibration of M-OH bond (M = Mn, Co) of MnCo-LDH. The IR spectra of all the SiO<sub>2</sub>@MnCo-LDH precursors show characteristic bands of SiO<sub>2</sub> at 1107 cm<sup>-1</sup> and 476 cm<sup>-1</sup> due to ν-Si-O-Si and δ-Si-O-Si, respectively. The bands observed at about 2230 cm<sup>-1</sup> and 1388 cm<sup>-1</sup> are ascribed to the OCN<sup>-</sup> and NO<sub>3</sub><sup>-</sup> ions present in the interlayer galleries of MnCo-LDH.<sup>3</sup> The band observed at about 659 cm<sup>-1</sup> is ascribed to stretching vibration of the M-OH bond (M = Mn, Co) in the SiO<sub>2</sub>@MnCo-LDH precursors.

#### Thermal gravimetric analysis

Figure S3 depicts the TGA curves of SiO<sub>2</sub>, MnCo-LDH, and SiO<sub>2</sub>@MnCo-LDH samples (SiO<sub>2</sub>@MnCo-LDH-0.25, SiO<sub>2</sub>@MnCo-LDH-0.5, and SiO<sub>2</sub>@MnCo-LDH-1). Table S2 gives the summary of TGA results. The TGA curve of SiO<sub>2</sub> shows the first weight loss step (~5 %) observed between 30 °C and 160 °C which is ascribed to the loss of physisorbed water molecules. The second weight loss step (~7.2 %) in the temperature range 200 °C to 600 °C is due to the removal of surface hydroxyl groups of SiO<sub>2</sub>.<sup>2</sup> The TGA curve of MnCo-LDH displays the first weight loss step of about 4.7 % below 145 °C which is ascribed to the loss of physisorbed water molecules. The second weight loss step of about 17.7 % between 145 °C and 350 °C is due to the decomposition of intercalated nitrate (NO<sub>3</sub><sup>-</sup>) and isocyanate (OCN<sup>-</sup>) anions present in MnCo-LDH.<sup>3</sup> The third weight loss step (~6.1 %) between 350 °C and 550 °C is attributed to the dehydroxylation of hydroxide layers of MnCo-LDH. The TGA curves of SiO<sub>2</sub>@MnCo-LDH-0.25, SiO<sub>2</sub>@MnCo-LDH-0.5, and SiO<sub>2</sub>@MnCo-LDH-1 show the first weight loss step of about 7.0 %, 8.0 %, and 4.2 %, respectively, between 30 °C and 160 °C ascribed to the loss of physisorbed H<sub>2</sub>O molecules. The second weight loss step of about 3.4 %, 5.2 %, and 12.8 %, respectively between 160 °C and 350 °C corresponds to decomposition of nitrate and isocyanate anions intercalated between the galleries of MnCo-LDH in SiO<sub>2</sub>@MnCo-LDH samples. The final weight loss step of about 5.2 %, 3.2 %, and 6.2 % between 350 °C and 600 °C corresponds to decomposition of hydroxide layers of MnCo-LDH present on the surface of SiO<sub>2</sub> (spheres) in SiO<sub>2</sub>@MnCo-LDH-0.25, SiO<sub>2</sub>@MnCo-LDH-0.5, and SiO<sub>2</sub>@MnCo-LDH-1, respectively.

#### Morphological and elemental analyses

Figure S4(a-e) depicts the FESEM images of SiO<sub>2</sub>, MnCo-LDH, and SiO<sub>2</sub>@MnCo-LDH samples before calcination. Figure S4(a) shows spherical SiO<sub>2</sub> particles with an average diameter of 162.5 ± 14.5 nm. The FESEM image of MnCo-LDH (Figure S4(b)) displays thin nanosheets (particles with flake-like morphology). The FESEM images of SiO<sub>2</sub>@MnCo-LDH samples (Figure S4(c-e)) display that the SiO<sub>2</sub> spheres are coated with MnCo-LDH nanosheets to form core-shell nanoparticles. Table S3 summarizes the elemental analysis data (EDXA results) for all the SiO<sub>2</sub>@MnCo-LDH precursors. The EDXA results indicate uniform elemental composition of Si, Mn, Co, and O in all the SiO<sub>2</sub>@MnCo-LDH precursors.

## Figures and Tables:

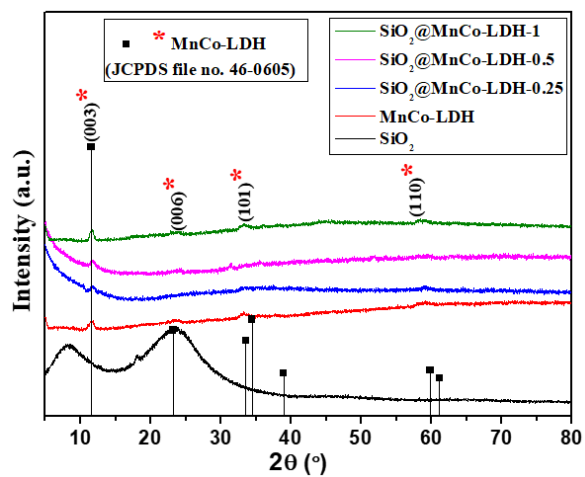

Fig. S1 XRD patterns of  $\text{SiO}_2$ ,  $\text{MnCo-LDH}$ , and  $\text{SiO}_2$ @ $\text{MnCo-LDH}$  precursors.

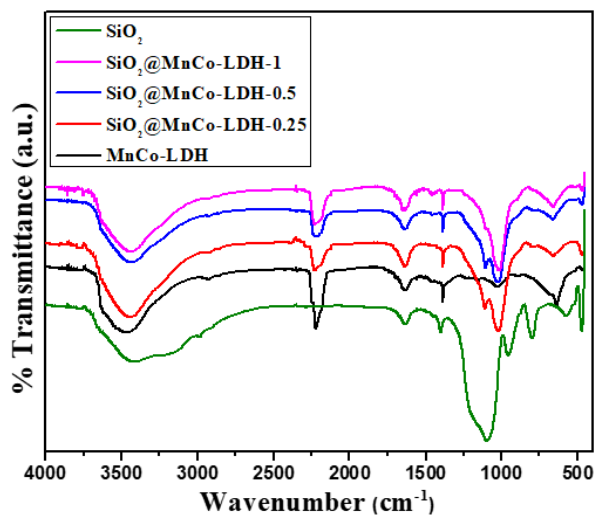

Fig. S2 FT-IR spectra of  $\text{SiO}_2$ ,  $\text{MnCo-LDH}$ , and  $\text{SiO}_2$ @ $\text{MnCo-LDH}$  samples.

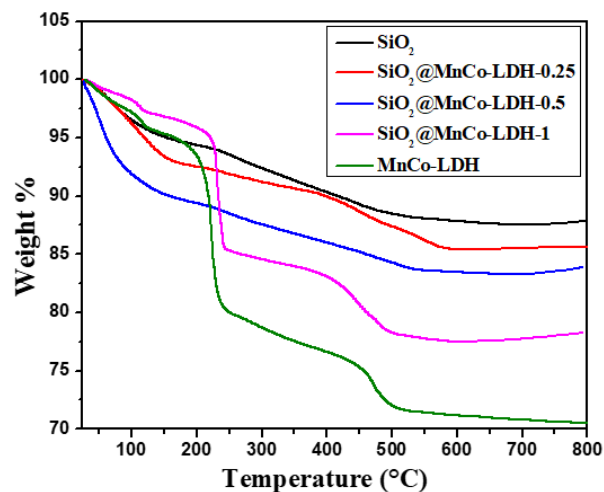

Fig. S3 TGA curves of SiO<sub>2</sub>, MnCo-LDH and SiO<sub>2</sub>@MnCo-LDH samples.

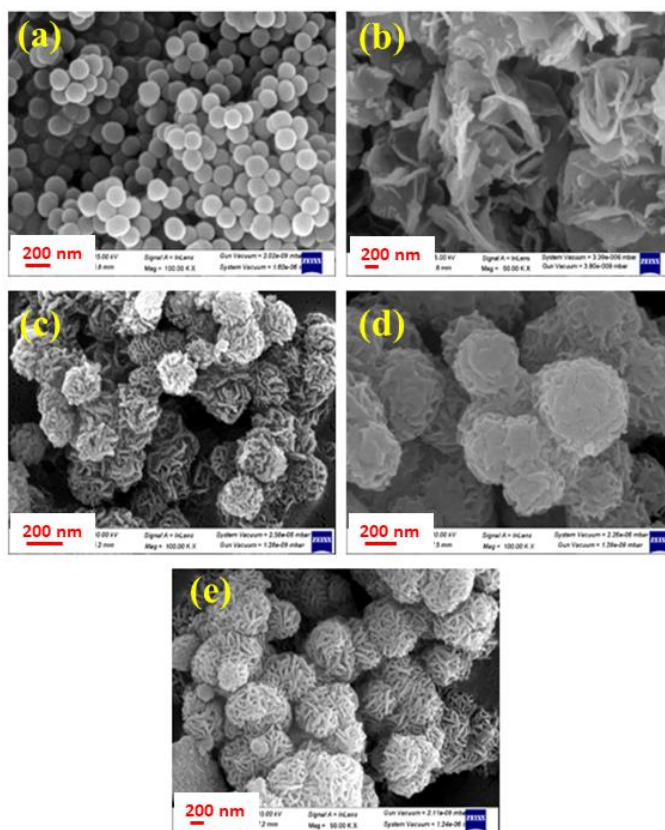

Fig. S4 FE-SEM images of (a) SiO<sub>2</sub>, (b) MnCo-LDH, (c) SiO<sub>2</sub>@MnCo-LDH-0.25, (d) SiO<sub>2</sub>@MnCo-LDH-0.5, and (e) SiO<sub>2</sub>@MnCo-LDH-1.

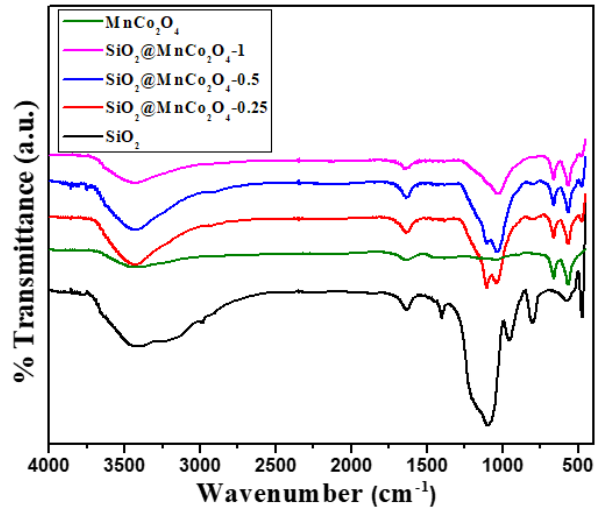

Fig. S5 FT-IR spectra of  $\text{SiO}_2$ ,  $\text{MnCo}_2\text{O}_4$ , and  $\text{SiO}_2@\text{MnCo}_2\text{O}_4$  samples calcined at 500 °C.

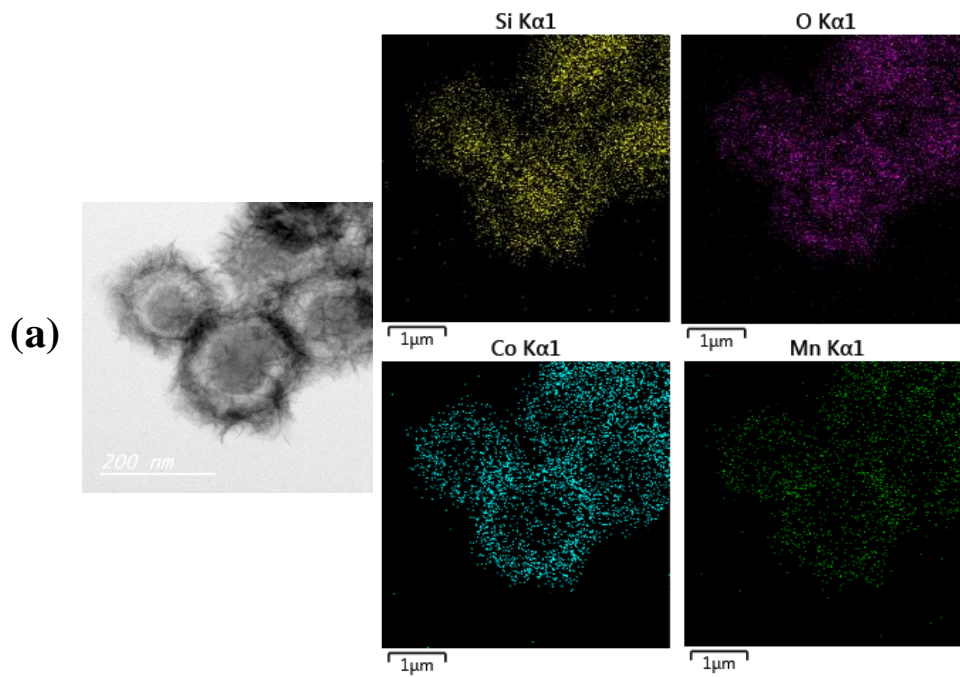

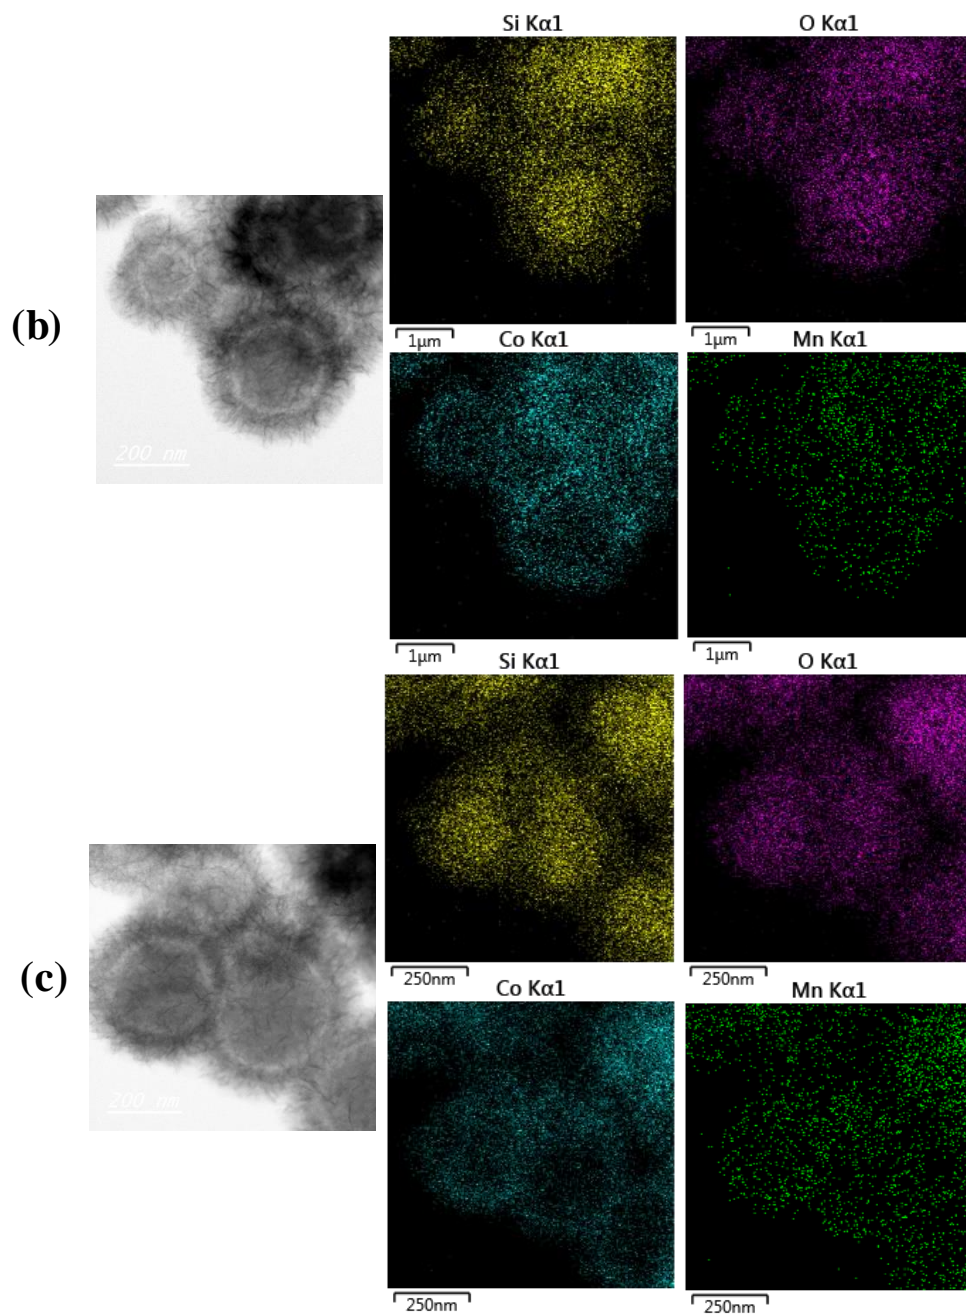

**Fig. S6** EDS mapping images of (a) SiO<sub>2</sub>@MnCo<sub>2</sub>O<sub>4</sub>-0.25, (b) SiO<sub>2</sub>@MnCo<sub>2</sub>O<sub>4</sub>-0.5 and (c) SiO<sub>2</sub>@MnCo<sub>2</sub>O<sub>4</sub>-1 core-shell nanorattles.

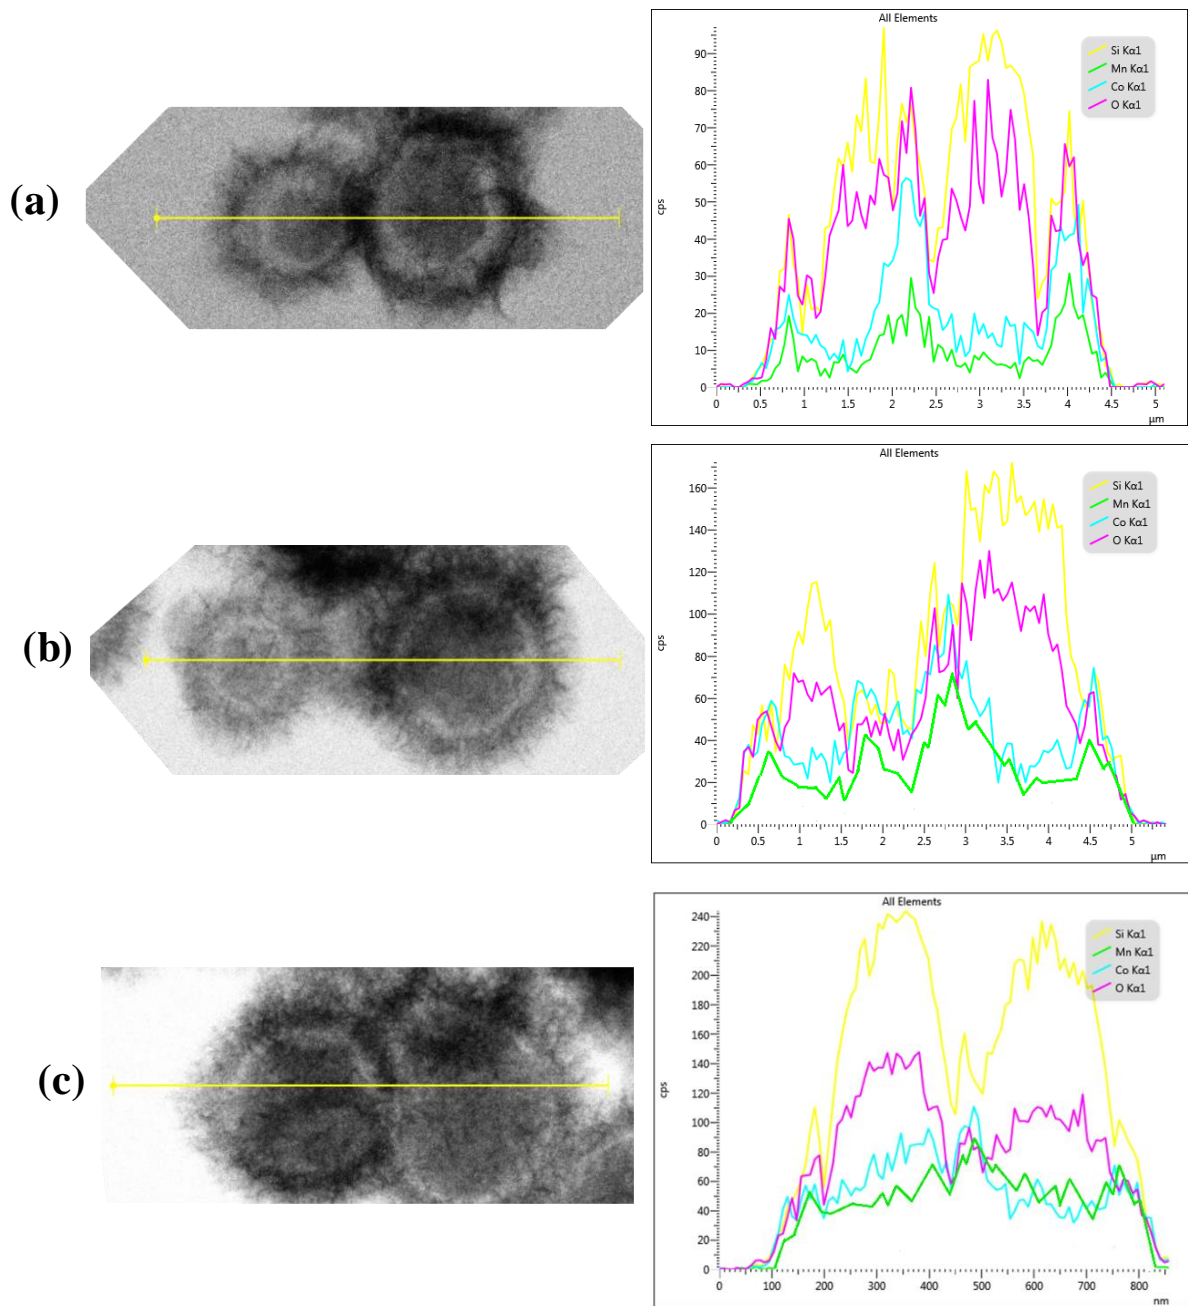

**Fig. S7** Linear scan EDS analysis data of (a)  $\text{SiO}_2@MnCo_2O_{4-0.25}$ , (b)  $\text{SiO}_2@MnCo_2O_{4-0.5}$  and (c)  $\text{SiO}_2@MnCo_2O_{4-1}$  core-shell nanorattles.



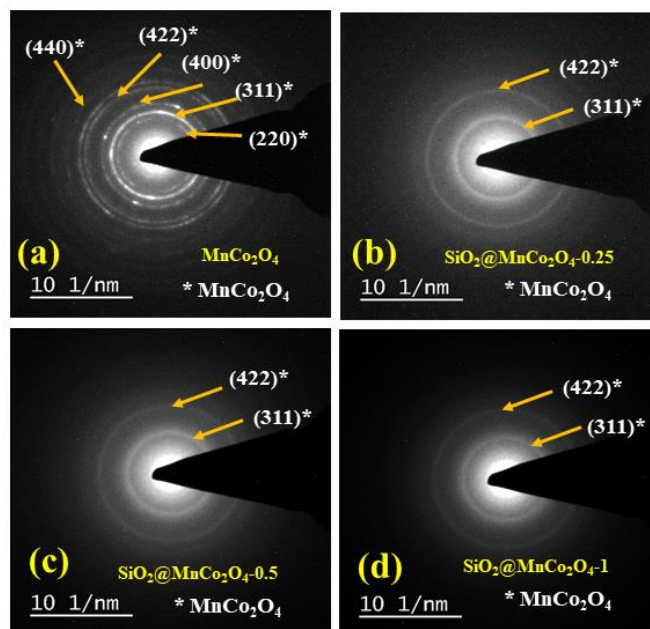

**Fig. S8** SAED patterns of (a)  $\text{MnCo}_2\text{O}_4$ , (b)  $\text{SiO}_2@\text{MnCo}_2\text{O}_4-0.25$ , (b)  $\text{SiO}_2@\text{MnCo}_2\text{O}_4-0.5$  and (d)  $\text{SiO}_2@\text{MnCo}_2\text{O}_4-1$  samples.

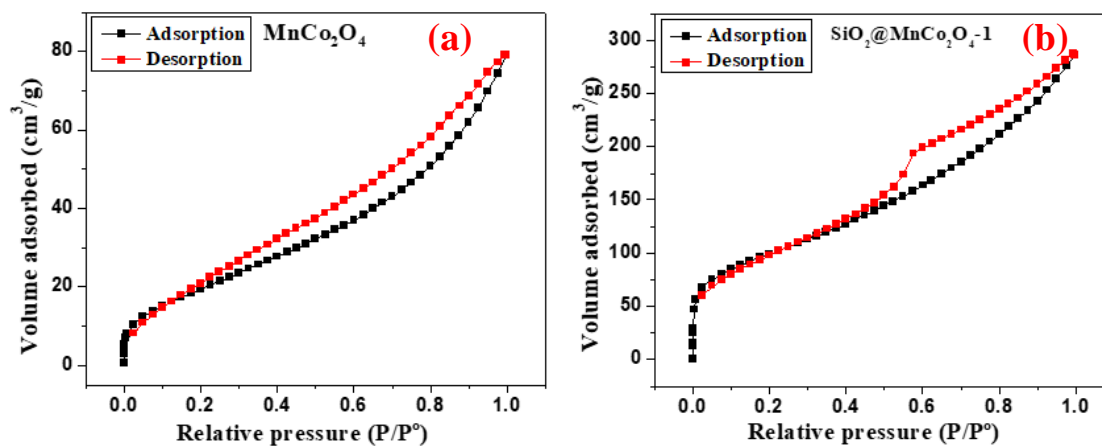

**Fig. S9** Adsorption-desorption isotherms of (a)  $\text{MnCo}_2\text{O}_4$  NPs and (b)  $\text{SiO}_2@\text{MnCo}_2\text{O}_4-1$  core-shell nanorattles.

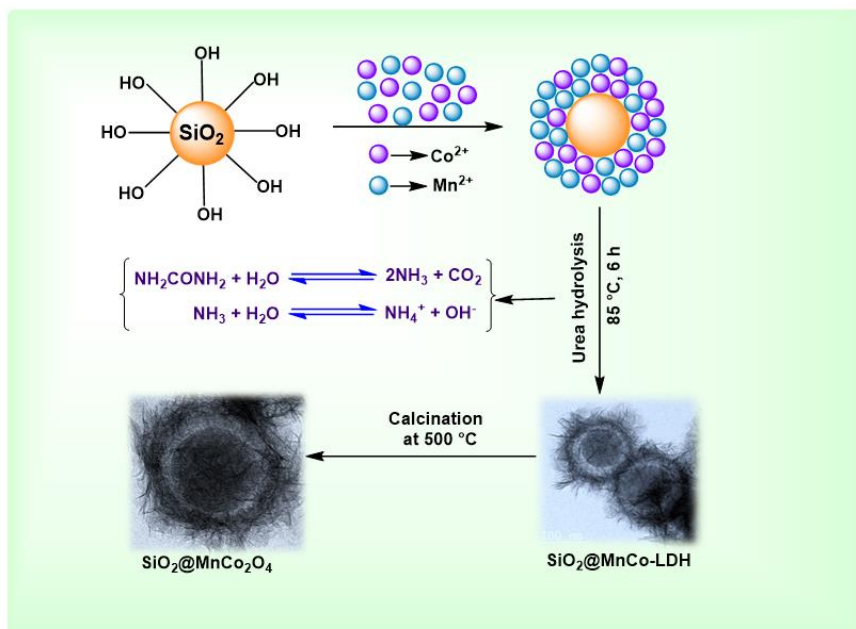

**Fig. S10** Proposed mechanism of formation of  $\text{SiO}_2@\text{MnCo}_2\text{O}_4$  core-shell nanorattles.

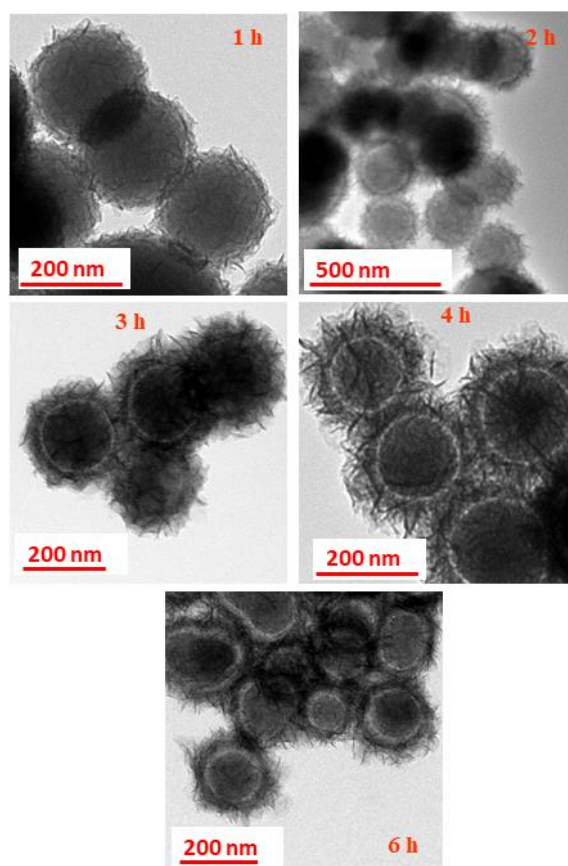

**Fig. S11** Time-dependent TEM images of  $\text{SiO}_2@\text{MnCo-LDH-0.25}$ .



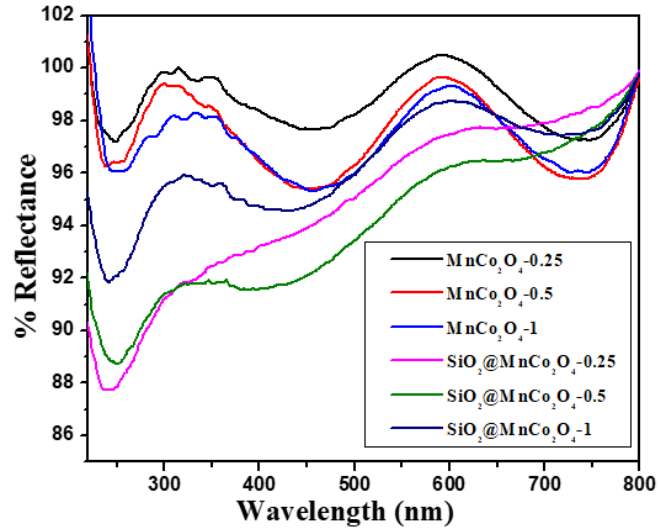

Fig. S12 DRS spectra of  $\text{MnCo}_2\text{O}_4$  NPs and  $\text{SiO}_2@\text{MnCo}_2\text{O}_4$  core-shell nanorattles.

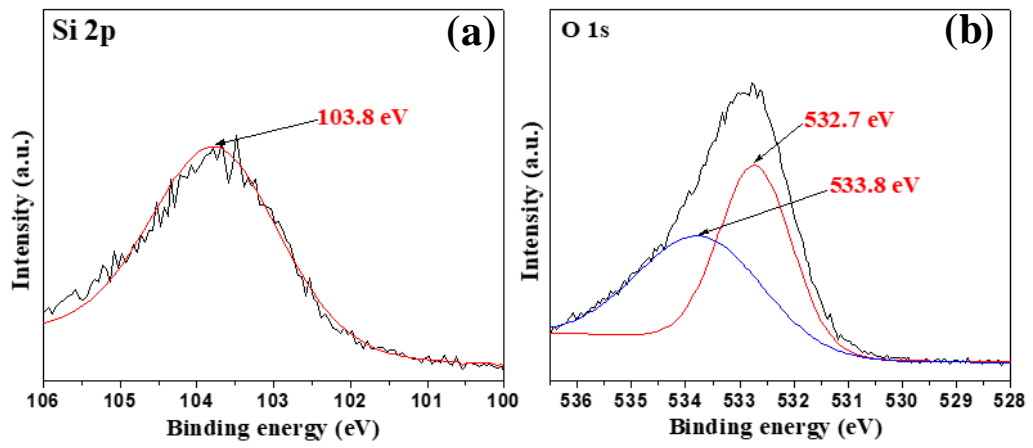

Fig. S13 XPS spectrum of  $\text{SiO}_2$ : (a) Si 2p and (b) O 1s.

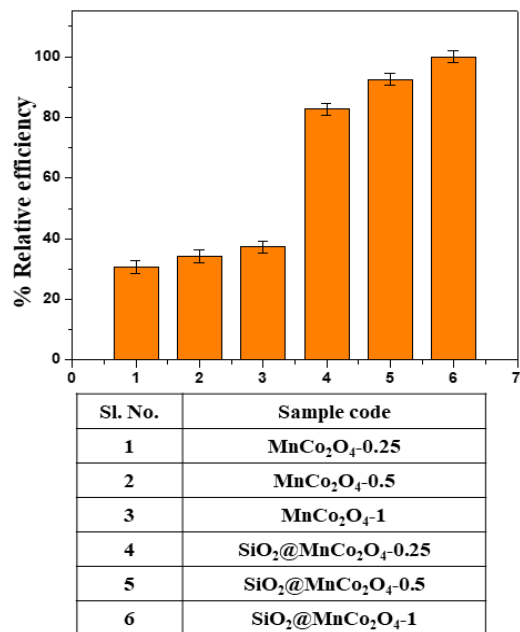

**Fig. S14** % Relative efficiency of MnCo<sub>2</sub>O<sub>4</sub> NPs and SiO<sub>2</sub>@MnCo<sub>2</sub>O<sub>4</sub> core-shell nanorattles as catalyst during peroxidase-like activity.

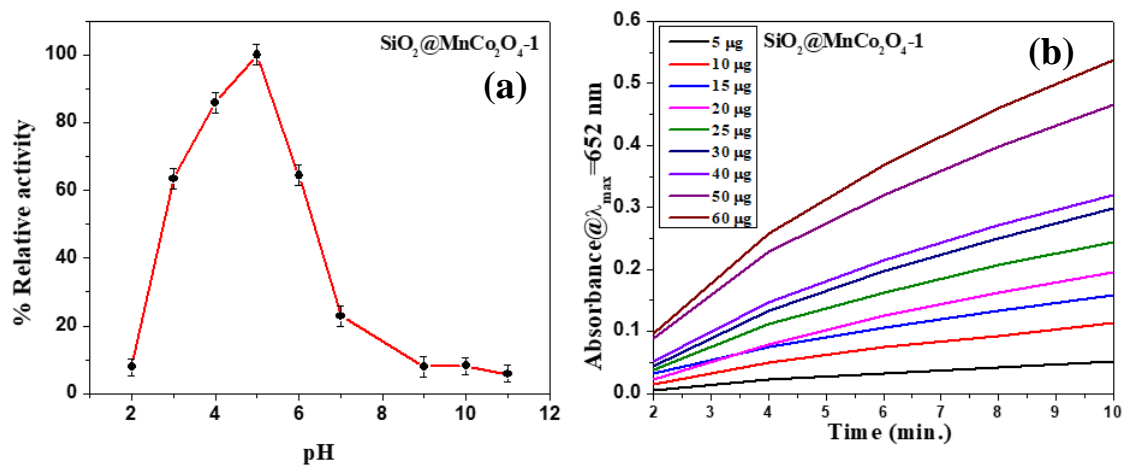

**Fig. S15** Effect of experimental conditions on peroxidase-like activity of SiO<sub>2</sub>@MnCo<sub>2</sub>O<sub>4</sub> core-shell nanorattles; (a) pH and (b) amount of catalyst dispersion.

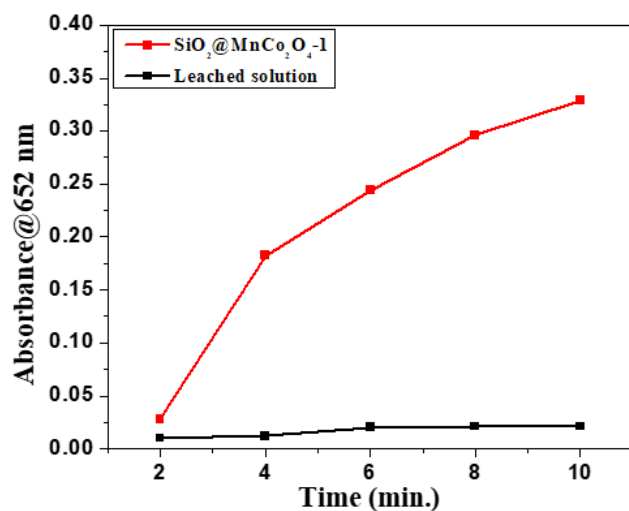

**Fig. S16:** Leaching test results during the peroxidase-like activity of SiO<sub>2</sub>@MnCo<sub>2</sub>O<sub>4</sub>-1 core-shell nanorattles.

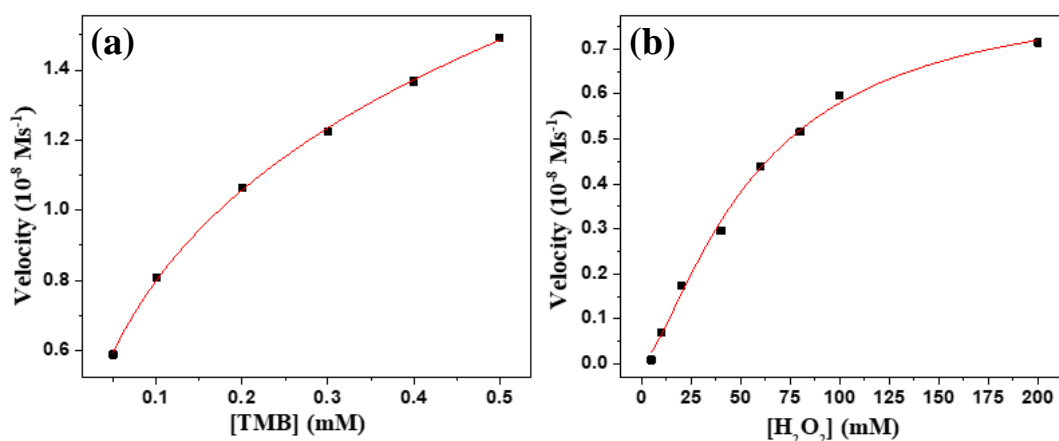

**Fig. S17** Steady-state kinetics results of SiO<sub>2</sub>@MnCo<sub>2</sub>O<sub>4</sub>-1 core-shell nanorattles using different substrates during the peroxidase-like activity studies: (a) TMB and (b) H<sub>2</sub>O<sub>2</sub>.

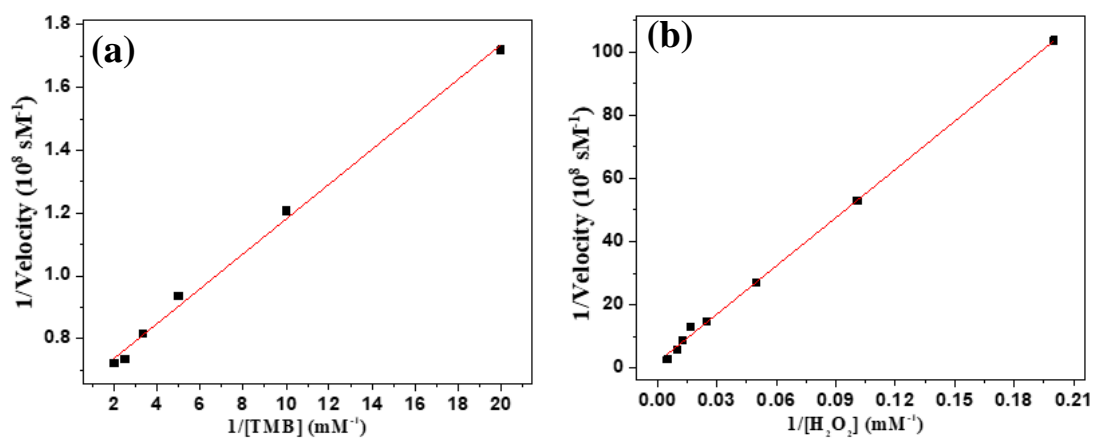

**Fig. S18** Lineweaver-Burk double reciprocal plots for SiO<sub>2</sub>@MnCo<sub>2</sub>O<sub>4</sub>-1 core-shell nanorattles corresponding to variation of concentration of substrates: (a) TMB and (b) H<sub>2</sub>O<sub>2</sub>.

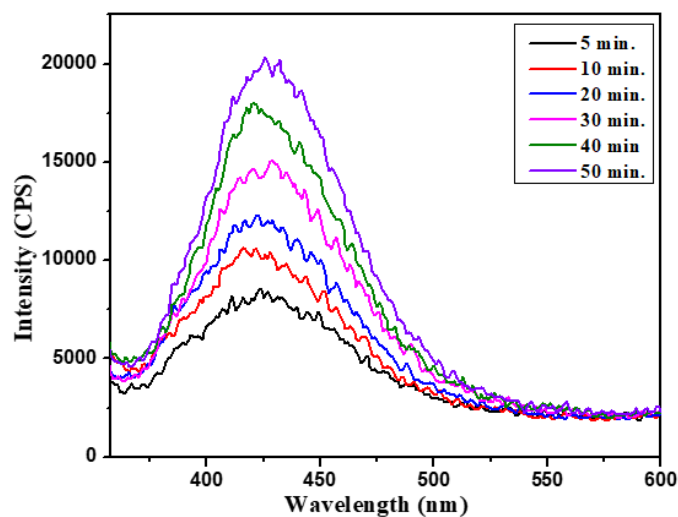

**Fig. S19** Fluorescence spectra indicating the formation of hydroxyl radicals during the catalytic oxidation of TMB by  $\text{SiO}_2@\text{MnCo}_2\text{O}_4\text{-1}$  core-shell nanorattles ( $\lambda_{\text{exc}} = 315 \text{ nm}$ ).

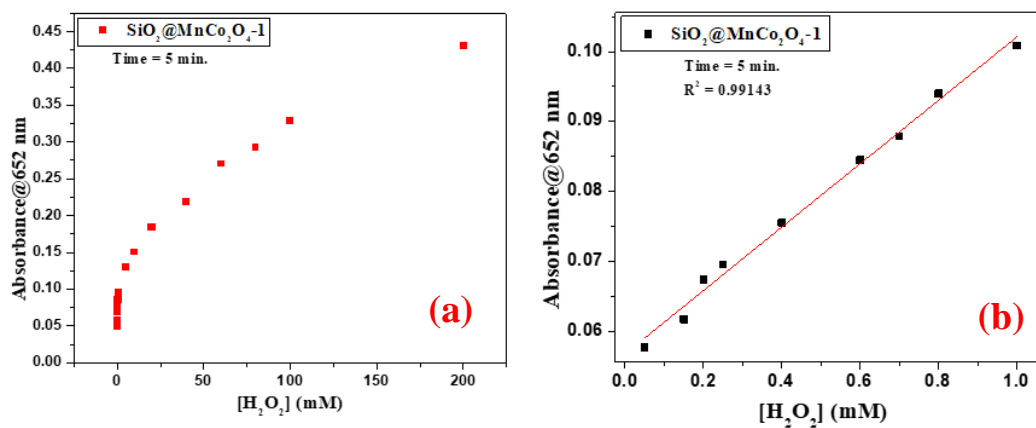

**Fig. S20** (a) Calibration plot for the detection of  $\text{H}_2\text{O}_2$  using  $\text{SiO}_2@\text{MnCo}_2\text{O}_4\text{-1}$  core-shell nanorattles, and (b) calibration plot in the linear range from 0.05 mM to 1.0 mM.

**Table S1** Assignment of IR bands ( $\text{cm}^{-1}$ ) of MnCo-LDH and  $\text{SiO}_2$ @MnCo-LDH samples.

| SiO <sub>2</sub> | MnCo-LDH | SiO <sub>2</sub> @MnCo-0.25 | SiO <sub>2</sub> @MnCo-0.5 | SiO <sub>2</sub> @MnCo-1 | Assignment                     |
|------------------|----------|-----------------------------|----------------------------|--------------------------|--------------------------------|
| 3431             | 3470     | 3436                        | 3438                       | 3428                     | $\nu$ -(OH)                    |
| ---              | 2217     | 2235                        | 2227                       | 2233                     | $\nu$ -(OCN)                   |
| 1640             | 1637     | 1634                        | 1638                       | 1647                     | $\delta$ -(OH)                 |
| ---              | 1382     | 1390                        | 1382                       | 1388                     | $\nu$ -(N-O)                   |
| 1100             | ---      | 1105                        | 1107                       | 1109                     | $\nu_{\text{asym}}$ -(Si-O-Si) |
| ---              | 1026     | 1024                        | 1025                       | 1023                     | $\rho$ -(OH)                   |
| 958              | ---      | ---                         | ---                        | ---                      | $\nu_{\text{sym}}$ -(Si-OH)    |
| 795              | ---      | ---                         | ---                        | ---                      | $\nu_{\text{sym}}$ -(Si-O-Si)  |
| ---              | 639      | 657                         | 649                        | 659                      | $\nu$ -(M-OH), M = Mn, Co      |
| 469              | ---      | 474                         | 476                        | 468                      | $\delta$ -(Si-O-Si)            |

**Table S2** Summary of TGA results of MnCo-LDH and  $\text{SiO}_2$ @MnCo-LDH samples.

| MnCo-LDH   |            | SiO <sub>2</sub> @MnCo-0.25 |            | SiO <sub>2</sub> @MnCo-0.5 |            | SiO <sub>2</sub> @MnCo-1 |            | Comment                                  |
|------------|------------|-----------------------------|------------|----------------------------|------------|--------------------------|------------|------------------------------------------|
| Temp. (°C) | % wt. loss | Temp. (°C)                  | % wt. loss | Temp. (°C)                 | % wt. loss | Temp. (°C)               | % wt. loss |                                          |
| 30-145     | 4.7        | 30-160                      | 7.0        | 30-100                     | 8.0        | 30-150                   | 4.2        | Loss of physisorbed water molecules      |
| 145-350    | 17.7       | 160-350                     | 3.4        | 100-350                    | 5.2        | 150-350                  | 12.8       | Loss of intercalated anions from the LDH |
| 350-550    | 6.1        | 350-600                     | 5.2        | 350-600                    | 3.2        | 350-600                  | 6.2        | Dehydroxylation of LDH layers            |
| Total      | 28.5       | ----                        | 15.6       | ---                        | 16.4       | ---                      | 23.2       | ---                                      |

**Table S3** EDX analysis results of SiO<sub>2</sub>@MnCo-LDH samples. The analysis was carried out at three different spots for each sample.

| Sample code                     | Element |       |       |       |       |
|---------------------------------|---------|-------|-------|-------|-------|
|                                 | O       | Si    | Mn    | Co    |       |
| SiO <sub>2</sub> @MnCo-LDH-0.25 | Wt. %   | 39.92 | 29.43 | 10.01 | 20.65 |
|                                 | At. %   | 61.30 | 25.74 | 4.69  | 8.27  |
|                                 | Wt. %   | 40.21 | 29.23 | 10.02 | 20.54 |
|                                 | At. %   | 61.64 | 24.17 | 4.70  | 8.49  |
|                                 | Wt. %   | 41.65 | 29.26 | 9.44  | 19.64 |
|                                 | At. %   | 60.69 | 24.83 | 4.85  | 9.62  |
| SiO <sub>2</sub> @MnCo-LDH-0.5  | Wt. %   | 41.94 | 23.28 | 11.41 | 23.37 |
|                                 | At. %   | 62.8  | 20.80 | 5.41  | 10.99 |
|                                 | Wt. %   | 42.09 | 24.77 | 11.06 | 22.08 |
|                                 | At. %   | 62.09 | 20.27 | 5.86  | 11.78 |
|                                 | Wt. %   | 43.34 | 23.61 | 11.58 | 21.48 |
|                                 | At. %   | 62.86 | 21.56 | 5.52  | 10.06 |
| SiO <sub>2</sub> @MnCo-LDH-1    | Wt. %   | 40.38 | 22.53 | 12.77 | 24.32 |
|                                 | At. %   | 60.75 | 19.16 | 7.2   | 12.88 |
|                                 | Wt. %   | 42.41 | 23.42 | 12.39 | 24.78 |
|                                 | At. %   | 61.49 | 19.83 | 7.21  | 11.47 |
|                                 | Wt. %   | 41.41 | 23.42 | 11.39 | 23.78 |
|                                 | At. %   | 60.49 | 19.83 | 7.47  | 12.21 |



**Table S4** EDX analysis results of SiO<sub>2</sub>@MnCo<sub>2</sub>O<sub>4</sub> nanorattles. The analysis was carried out at three different spots for each sample.

| Sample code                                              | Element |       |       |       |       |
|----------------------------------------------------------|---------|-------|-------|-------|-------|
|                                                          |         | O     | Si    | Mn    | Co    |
| SiO <sub>2</sub> @MnCo <sub>2</sub> O <sub>4</sub> -0.25 | Wt. %   | 37.38 | 31.18 | 10.72 | 20.72 |
|                                                          | At. %   | 58.84 | 25.06 | 5.54  | 10.56 |
|                                                          | Wt. %   | 37.49 | 31.53 | 10.50 | 20.48 |
|                                                          | At. %   | 59.42 | 25.75 | 5.00  | 9.82  |
|                                                          | Wt. %   | 36.02 | 31.89 | 11.57 | 20.52 |
|                                                          | At. %   | 58.48 | 24.87 | 6.53  | 10.13 |
| SiO <sub>2</sub> @MnCo <sub>2</sub> O <sub>4</sub> -0.5  | Wt. %   | 38.43 | 26.79 | 12.42 | 22.37 |
|                                                          | At. %   | 58.82 | 24.15 | 6.11  | 12.91 |
|                                                          | Wt. %   | 39.67 | 27.46 | 11.46 | 22.42 |
|                                                          | At. %   | 60.38 | 23.80 | 6.09  | 12.73 |
|                                                          | Wt. %   | 40.14 | 27.40 | 11.79 | 23.66 |
|                                                          | At. %   | 59.08 | 24.14 | 6.16  | 11.98 |
| SiO <sub>2</sub> @MnCo <sub>2</sub> O <sub>4</sub> -1    | Wt. %   | 36.22 | 22.45 | 13.77 | 27.55 |
|                                                          | At. %   | 56.07 | 21.21 | 7.82  | 14.90 |
|                                                          | Wt. %   | 34.70 | 23.10 | 13.73 | 28.47 |
|                                                          | At. %   | 56.43 | 21.16 | 7.83  | 14.59 |
|                                                          | Wt. %   | 36.31 | 22.03 | 14.19 | 27.48 |
|                                                          | At. %   | 57.51 | 20.97 | 7.49  | 14.03 |

**References:**

- 1 F. Song and X. Hu, *J. Am. Chem. Soc.*, 2014, **136**, 16481–16484.
- 2 S. Kandula and P. Jeevanandam, *RSC Adv.*, 2015, **5**, 5295–5306.
- 3 S. Kandula and P. Jeevanandam, *Eur. J. Inorg. Chem.*, 2015, **2015**, 4260–4274.
